# Supplementary material
Source: ML conference proceedings conference paper supplement (https://proceedings.mlr.press/v33/obermeyer14.html)
Supplement: Supplementary file 1 [file obermeyer14-supp.pdf]

## A Proofs of clustering speedup

*Proof of Lemma 1.* Given portions  $x$  and  $y$  of red and blue balls, resp., in the left urn, consider the  $2 \times 2 \times 2$  possible Gibbs moves: remove red/blue from left/right urn and replace in left/right urn. For large data size  $N$ , data size changes very little after a single removal, so the add and remove steps decouple into differentials  $dx_{\text{rem}}$ ,  $dy_{\text{rem}}$ ,  $dx_{\text{add}}$ , and  $dy_{\text{add}}$ . Compute the probabilities of each move; then compute the mean and variance in  $x$  and, by red-blue symmetry,  $y$ :

$$\begin{aligned}\mathbb{E}[dx_{\text{rem}}] &= \frac{1}{N} \frac{1-2x}{2} \\ \mathbb{V}[dx_{\text{rem}}] &= \frac{1}{N^2} \frac{x(1-x)}{r} \\ \mathbb{E}[dx_{\text{add}}] &= \frac{1}{2N} \frac{n_2 r_1 - n_1 r_2}{n_2 r_1 + n_1 r_2} + \frac{\alpha}{N^2} \frac{2n_1}{xr + (1-x)l} \\ \mathbb{V}[dx_{\text{add}}] &= \frac{1}{N^2} \frac{r n_2 r_1 n_1 r_2}{(n_2 r_1 + n_1 r_2)^2} \\ &\quad + \frac{\alpha}{N^3} \left[ \frac{n_1 n_2}{(x n_1 + (1-x)n_2)^2} + \frac{2}{x n_1 + (1-x)n_2} \right]\end{aligned}$$

with lower-case intrinsic quantities defined as

$$\begin{aligned}r_1 &= (\#\text{red on left})/N & r_2 &= (\#\text{red on right})/N \\ b_1 &= (\#\text{blue on left})/N & b_2 &= (\#\text{blue on right})/N \\ n_1 &= r_1 + b_1 & n_2 &= r_2 + b_2\end{aligned}$$

These moments comprise the  $N$ -scaled Fokker-Planck coefficients

$$\begin{aligned}f &= N \begin{bmatrix} \mathbb{E}[dx_{\text{rem}} + dx_{\text{add}}] \\ \mathbb{E}[dy_{\text{rem}} + dy_{\text{add}}] \end{bmatrix} \\ D &= N^2 \begin{bmatrix} \mathbb{V}[dx_{\text{rem}} + dx_{\text{add}}] & 0 \\ 0 & \mathbb{V}[dy_{\text{rem}} + dy_{\text{add}}] \end{bmatrix}\end{aligned}$$

By inspection these depend only on intrinsic quantities and the scaled hyperparameter  $\frac{\alpha}{N}$ .  $\square$

*Proof of Theorem 2.* At fixed error bound  $\epsilon$ , the continuous dynamics is within  $\epsilon$  of true dynamics by data size, say,  $N_\epsilon$ . Thus at large data sizes, the MCMC dynamics is linear and mixing time is  $T_{\text{cold}} = O(N^2 \log(\epsilon))$ . In a subsample annealing schedule  $\beta(t) = t/T$ , the subsample annealing dynamics at subsamples larger than  $N_\epsilon$  is approximately time-scaled versions of the dynamics at full size  $N$ , so the effective schedule length is

$$T_{\text{eff}} = \int_{\frac{N_\epsilon}{N}T}^T \frac{dt}{\beta(t)^2} = \frac{1}{N} \left[ \frac{1}{N_\epsilon} - \frac{1}{N} \right] \geq \frac{2}{NN_\epsilon}$$

Since effective time is inverse in data size, annealing mixes in time  $T_{\text{anneal}} = O(N \log(\epsilon))$ .  $\square$

## B Proofs of bimodal speedup

*Proof of Lemma 3.* Consider a two-state system  $\mathbf{x} = [x, 1-x]^T$  at energy levels  $[N\gamma, 0]$ . The steady-state solution at temperature  $\beta$  should be  $\pi_\beta := [\sigma(\beta\gamma N), \sigma(\beta\gamma N)]$ , where  $\sigma(t) = \frac{1}{1+\exp(-t)}$  is the logistic sigmoid function. In continuous time mixing, we think of the state briefly jumping on to an energy barrier of height  $\beta\delta N$  then jumping back down according to  $\pi_\beta$ . If the rate of jumping up to energy  $\beta\delta N$  is  $\exp(-\beta\delta N)$ , then the dynamics is:

$$\frac{d\mathbf{x}}{dt} = \exp(-\beta\delta N) \left[ \begin{bmatrix} \sigma(\beta\gamma N) & \sigma(\beta\gamma N) \\ \sigma(-\beta\gamma N) & \sigma(-\beta\gamma N) \end{bmatrix} - \mathbf{I} \right] \mathbf{x}$$

The first coordinate  $x$  determines the state; expanding yields Equation 1.  $\square$

*Proof of Theorem 4.* In this binary system the TVD of state  $x$  from truth is  $|x - x_{\text{true}}| = |x - \sigma(\gamma N)|$ . Now we seek asymptotic lower bounds on  $T$  guaranteeing  $\text{TVD} < \epsilon$ . To prove (a) observe that in cold inference ( $\beta = 1$ ), the system is linear homogeneous with eigenvalue  $\exp(-N\delta)$ . To prove (b) we transform from time coordinates  $t$  to “natural” coordinates

$$\tau = \exp\left(\frac{T}{N\delta} \left[ \exp\left(-\frac{N\delta t}{T}\right) - \exp(-N\delta) \right]\right),$$

where, assuming worst-case initial condition  $x(0) = 0$ , the final state  $x$  is a uniform integral

$$x = \int_0^1 \sigma(\beta(\tau)N\gamma) d\tau$$

involving the transformed annealing schedule

$$\beta(\tau) = \frac{-1}{N\delta} \log\left(\exp(-N\delta) - \frac{N\delta}{T} \log(\tau)\right).$$

Using the inequality  $\sigma(\gamma) - \sigma(\beta\gamma) \leq \exp(-\beta\gamma)$ , we can bound error by

$$\text{TVD} < \int_0^1 \exp(-\beta(\tau)N\gamma) d\tau \quad (2)$$

Since the integrand  $\exp(-\beta(\tau)N\gamma)$  is bounded in  $(0, 1)$ , and  $\beta(\tau)$  is increasing, Equation 2 holds if  $T$  is chosen large enough that  $\exp(-\beta(\epsilon/2)) > 1$ , for example if

$$T > \frac{N\delta \log\left(\frac{2}{\epsilon}\right)}{\left(\frac{\epsilon}{2}\right)^{\frac{\delta}{\gamma}} - \exp(-N\delta)}$$

or more conservatively, for any  $K > 1$ , and sufficiently large  $N$ ,

$$T > KN\delta \log\left(\frac{2}{\epsilon}\right) \left(\frac{2}{\epsilon}\right)^{\frac{\delta}{\gamma}},$$

whence the asymptotic bound.  $\square$
